# Supplementary material for: Coaxial hetero-nanostructures with controllable shell thickness: a “Pore Widening” method
Source: Royal Society of Chemistry journal article supplement (doi:10.1039/c4ra00045e), 2014-01-01
Supplement: c4ra00045e.pdf [file c4ra00045e.pdf]

## Supporting Information

### Coaxial Hetero-Nanostructures with Controllable Shell Thickness: A “Pore Widening” Method

Pui Yee Loh<sup>a</sup>, Chenmin Liu<sup>b</sup>, Chong Haur Sow<sup>c</sup> and Wee Shong Chin\*<sup>a</sup>

<sup>a</sup> Department of Chemistry, Faculty of Science, National University of Singapore, 3 Science Drive 3, Singapore 117543, Singapore. E-mail: chmcws@nus.edu.sg

<sup>b</sup> Nano and Advanced Materials Institute, The Hong Kong Jockey Club Enterprise Center, Hong Kong University of Science and Technology, Clear Water Bay, Kowloon, Hong Kong.

<sup>c</sup> Department of Physics, Faculty of Science, National University of Singapore, 2 Science Drive 3, Singapore 117542, Singapore.

**Table S1:** A brief summary on reported synthesis of core-shell NWs and NTs in the literature.

| Product                                                                       | Synthesis method                                                                                                   | Properties and Potential application         | Ref. |
|-------------------------------------------------------------------------------|--------------------------------------------------------------------------------------------------------------------|----------------------------------------------|------|
| <i>p-i-n</i> coaxial silicon NWs                                              | Sequential vapour-liquid-solid (VLS) deposition                                                                    | Photovoltaic device                          | [1]  |
| TiO <sub>2</sub> /Ni(OH) <sub>2</sub> or TiO <sub>2</sub> /NiO core/shell NRs | TiO <sub>2</sub> NRs core: Hydrothermal<br>Ni(OH) <sub>2</sub> or NiO shell: chemical bath deposition              | Solar hydrogen generation and supercapacitor | [2]  |
| Co(OH) <sub>2</sub> NF/ITO NWs                                                | ITO NWs core: Chemical vapour deposition (CVD)<br>Co(OH) <sub>2</sub> NFs shell: Potentiodynamic electrodeposition | Electrochemical capacitor                    | [3]  |
| Co <sub>3</sub> O <sub>4</sub> NW/NiO NF core-shell                           | Co <sub>3</sub> O <sub>4</sub> NWs core: Hydrothermal<br>NiO NFs shell: Chemical bath deposition                   | Electrochemical capacitor                    | [4]  |
| BN-sheathed semiconductor NWs: ZnS/BN and Si-SiO <sub>2</sub> /BN core-shell  | Vapour-solid reaction process                                                                                      | Coat NWs with insulating sheath of BN        | [5]  |
| Cu <sub>2</sub> S/Au core-shell NWs                                           | Redox deposition method                                                                                            | Demonstrated synthesis method                | [6]  |
| Zn/ZnS nanocable                                                              | Thermal reduction/sulfidation                                                                                      | Demonstrated synthesis method                | [7]  |
| Ga-filled single-crystalline MgO NTs                                          | CVD                                                                                                                | Wide-temperature range nanothermometer       | [8]  |

|                                                                                          |                                                                                                                                                                                                        |                                                                                                                                                              |      |
|------------------------------------------------------------------------------------------|--------------------------------------------------------------------------------------------------------------------------------------------------------------------------------------------------------|--------------------------------------------------------------------------------------------------------------------------------------------------------------|------|
| GaP/SiO <sub>x</sub> , GaP/C and GaP/SiO <sub>x</sub> /C coaxial nanocables              | CVD                                                                                                                                                                                                    | SiO <sub>x</sub> shell reduced surface defects of GaP core NWs. C outer layer enhanced conductivity of NWs.                                                  | [9]  |
| Ni NT encapsulated in CNT                                                                | Ni NTs grown within AAO followed by pyrolysis of C <sub>2</sub> H <sub>2</sub> to form CNTs                                                                                                            | Demonstrated synthesis method                                                                                                                                | [10] |
| PANI/Au core-shell NWs arrays                                                            | AAO template-assisted deposition followed by core-shrinkage                                                                                                                                            | Demonstrated synthesis method                                                                                                                                | [11] |
| PPy/Au capped core-shell NWs and Au NTs arrays                                           | AAO template-assisted deposition followed by pore-etching via NaOH                                                                                                                                     | Demonstrated synthesis method. Au NTs showed a broad plasmon resonance at ~700 nm. PPy/Au capped core-shell NWs showed a second extinction peak near 550 nm. | [12] |
| Pd/Pt core-shell NW arrays                                                               | AAO template-assisted deposition followed by coating of Pt shell via magnetron sputtering after removal of template using NaOH                                                                         | Highly effective electrocatalyst for electrooxidation of methanol                                                                                            | [13] |
| Ni/Au core-shell NWs                                                                     | AAO template-assisted deposition of Ni core followed by coating of Au shell by electroless-plating after removal of template using NaOH                                                                | Ni/Au core-shell NWs functionalized with streptavidin-fluorescent dyes were studied for toxicological effects on pancreatic cancer cells                     | [14] |
| Mineral oil/(PVP-aTiO <sub>2</sub> ) core-shell and Anatase TiO <sub>2</sub> NTs         | Electrospinning from a coaxial jet. TiO <sub>2</sub> NTs were obtained after removal of mineral oil core and calcinations                                                                              | Demonstrated synthesis method                                                                                                                                | [15] |
| SiO <sub>2</sub> NTs and Au/SiO <sub>2</sub> core-shell NWs                              | SiO <sub>2</sub> NTs prepared using AAO template-assisted sol-gel deposition, followed by electrodeposition of Au into the NTs                                                                         | SiO <sub>2</sub> -insulated Au NWs (Au/SiO <sub>2</sub> ) showed high-quality dielectric properties                                                          | [16] |
| ZnO/Al <sub>2</sub> O <sub>3</sub> core-shell NFs and Al <sub>2</sub> O <sub>3</sub> NTs | Al <sub>2</sub> O <sub>3</sub> were deposited onto ZnO NWs template via atomic layer deposition (ALD). Removal of ZnO core gave Al <sub>2</sub> O <sub>3</sub> NTs                                     | Demonstrated synthesis method                                                                                                                                | [17] |
| Bi/Bi <sub>2</sub> O <sub>3</sub> core-shell NWs and Bi <sub>2</sub> O <sub>3</sub> NTs  | AAO template-assisted electrodeposition followed by slow thermal oxidation. Bi <sub>2</sub> O <sub>3</sub> NTs obtained via fast thermal oxidation of Bi/Bi <sub>2</sub> O <sub>3</sub> core-shell NWs | Demonstrated synthesis method                                                                                                                                | [18] |
| PPy/ZnS core-shell NWs                                                                   | AAO template-assisted deposition of ZnS NTs via MOCVD followed by electrodeposition of PPy core within the ZnS NTs.                                                                                    | Observed positive shifts in the redox potentials of PPy and rectification behaviour due to electron transfer between ZnS shell and PPy core.                 | [19] |
| ZnO:Cl/ZnS core-shell NWs                                                                | ZnO:Cl NWs were electrochemically grown onto FTO electrode. ZnS shell was formed via successive ionic layer adsorption and reaction (SILAR) method.                                                    | ZnO:Cl/ZnS core-shell NWs showed photocurrent enhancement compared to ZnO:Cl NWs                                                                             | [20] |

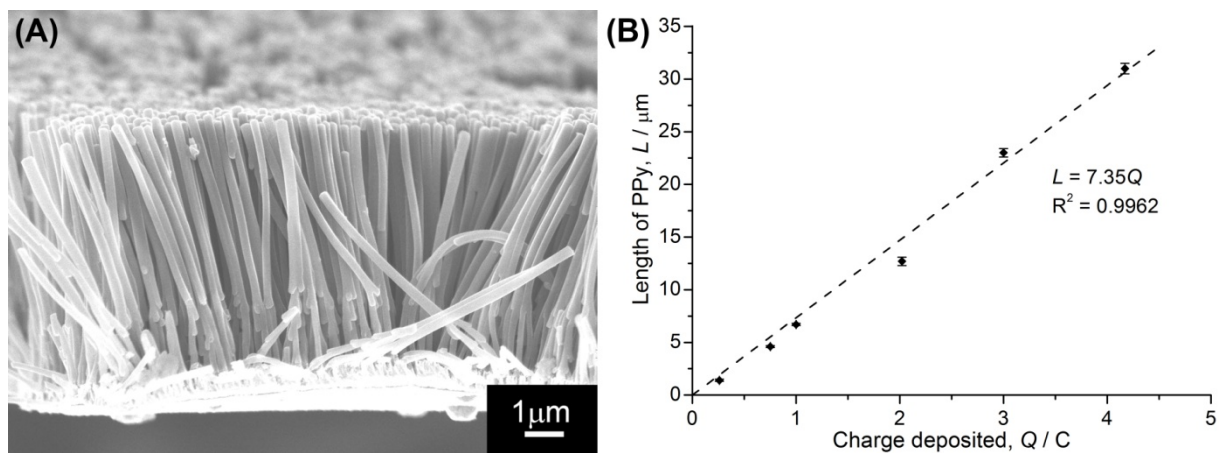

**Fig. S1:** (A) SEM image of as-deposited PPy NWs array, and (B) calibration plot of length of PPy NWs obtained as a function of charge deposited.

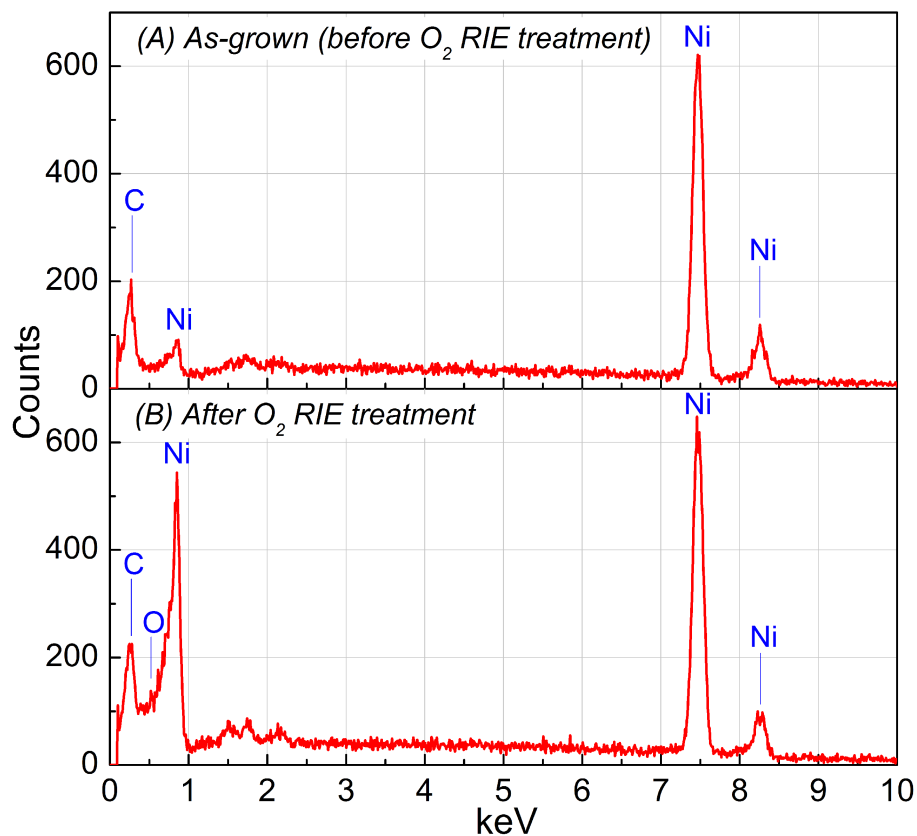

**Fig. S2:** EDX spectra of PPY/Ni core-shell NWs array (A) before and (B) after oxygen reactive ion etching ( $O_2$  RIE) treatment. Only slight increase in oxygen content was detected for sample after  $O_2$  RIE treatment in (B).

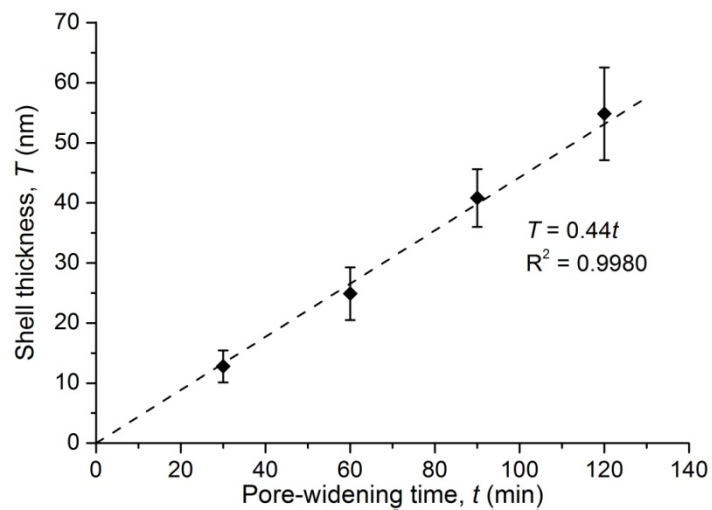

**Fig. S3:** Calibration plot of Ni shell thickness obtained as a function of pore-widening time.

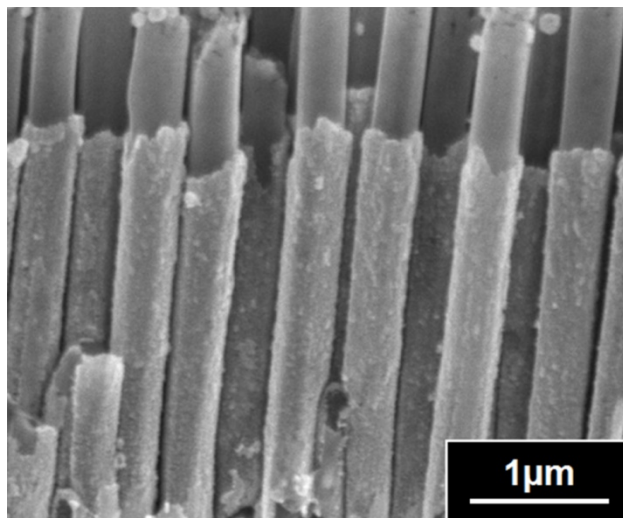

**Fig. S4:** Side view SEM image of PPy/Cu core-shell NWs array prepared by "Pore Widening" method.

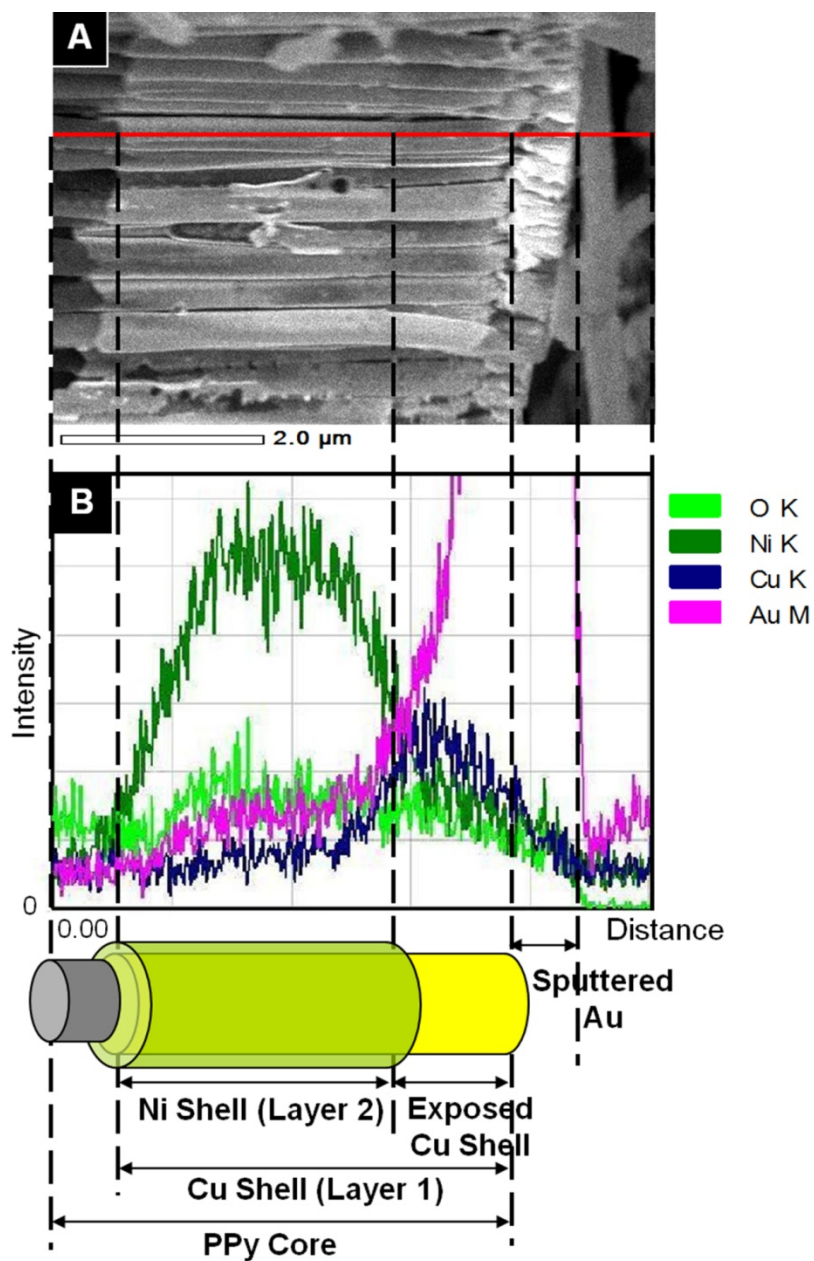

**Fig. S5:** EDX line analysis of tri-layered NWs: (A) SEM image of the PPy/Cu/Ni tri-layered core-shell NWs array. (B) The compositional line profiles probed by EDX along the red line in (A), showing well-correlated Ni and Cu signals along the NW axis.

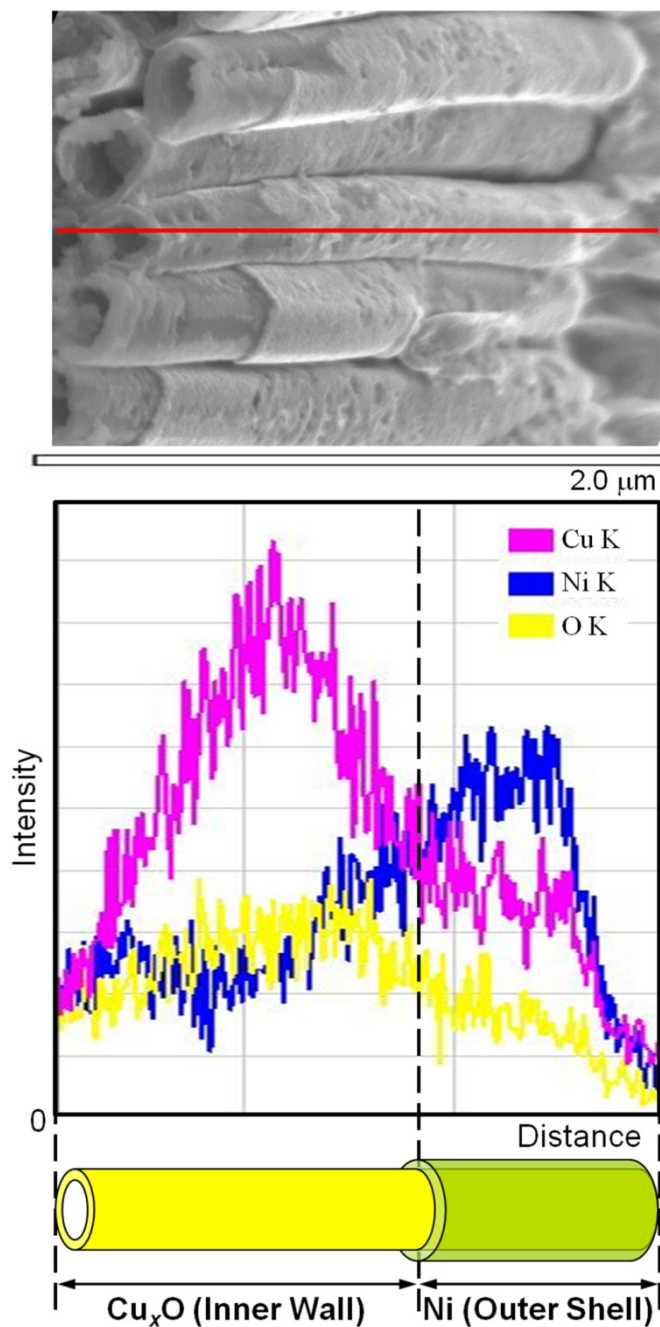

**Fig. S6:** EDX line analysis of the  $\text{Cu}_x\text{O}/\text{Ni}$  DWNT, indicating a fairly uniform distribution of the metal and oxide.

## References

1. B. Z. Tian, X. L. Zheng, T. J. Kempa, Y. Fang, N. F. Yu, G. H. Yu, J. L. Huang and C. M. Lieber, *Nature*, 2007, **449**, 885-890.
2. X. H. Xia, J. S. Luo, Z. Y. Zeng, C. Guan, Y. Q. Zhang, J. P. Tu, H. Zhang and H. J. Fan, *Sci. Rep.*, 2012, **2**, 981.
3. C. Y. Yan, H. Jiang, T. Zhao, C. Z. Li, J. Ma and P. S. Lee, *J. Mater. Chem.*, 2011, **21**, 10482-10488.
4. X. H. Xia, J. P. Tu, Y. Q. Zhang, X. L. Wang, C. D. Gu, X. B. Zhao and H. J. Fan, *ACS Nano*, 2012, **6**, 5531-5538.

5. Y. C. Zhu, Y. Bando, D. F. Xue, F. F. Xu and D. Golberg, *J. Am. Chem. Soc.*, 2003, **125**, 14226-14227.
6. X. G. Wen and S. H. Yang, *Nano Lett.*, 2002, **2**, 451-454.
7. Q. Li and C. R. Wang, *Appl. Phys. Lett.*, 2003, **82**, 1398-1400.
8. Y. B. Li, Y. Bando, D. Golberg and Z. W. Liu, *Appl. Phys. Lett.*, 2003, **83**, 999-1001.
9. S. Y. Bae, H. W. Seo, H. C. Choi, D. S. Han and J. Park, *J. Phys. Chem. B*, 2005, **109**, 8496-8502.
10. J. C. Bao, K. Y. Wang, Z. Xu, H. Zhang and Z. H. Lu, *Chem. Commun.*, 2003, 208-209.
11. M. Lahav, E. A. Weiss, Q. B. Xu and G. M. Whitesides, *Nano Lett.*, 2006, **6**, 2166-2171.
12. W. R. Hendren, A. Murphy, P. Evans, D. O'Connor, G. A. Wurtz, A. V. Zayats, R. Atkinson and R. J. Pollard, *J. Phys.-Condes. Matter*, 2008, **20**, 362203.
13. H. Wang, C. W. Xu, F. L. Cheng, M. Zhang, S. Y. Wang and S. P. Jiang, *Electrochem. Commun.*, 2008, **10**, 1575-1578.
14. I. T. Jeon, M. K. Cho, J. W. Cho, B. H. An, J. H. Wu, R. Kringel, D. S. Choi and Y. K. Kim, *J. Mater. Chem.*, 2011, **21**, 12089-12095.
15. D. Li and Y. N. Xia, *Nano Lett.*, 2004, **4**, 933-938.
16. N. I. Kovtyukhova, T. E. Mallouk and T. S. Mayer, *Adv. Mater.*, 2003, **15**, 780-785.
17. J. Hwang, B. D. Min, J. S. Lee, K. Keem, K. Cho, M. Y. Sung, M. S. Lee and S. Kim, *Adv. Mater.*, 2004, **16**, 422-425.
18. L. Li, Y. W. Yang, G. H. Li and L. D. Zhang, *Small*, 2006, **2**, 548-553.
19. D. Z. Zhang, L. A. Luo, Q. Liao, H. Wang, H. B. Fu and J. N. Yao, *J. Phys. Chem. C*, 2011, **115**, 2360-2365.
20. J. D. Fan, C. Fabrega, R. Zamani, A. Shavel, F. Guell, A. Carrete, T. Andreu, A. M. Lopez, J. R. Morante, J. Arbiol and A. Cabot, *J. Alloys Compd.*, 2013, **555**, 213-218.
